# Supplementary material
Source: PubMed Central journal article supplement (PMC7490161)

## Human versus bovine milk derived fortifiers in preterm infants - a systematic review and meta-analysis

Dr Anitha Ananthan et al

### Online Supplementary Material

Supplemental Table 1: The characteristics of the included studies<sup>1</sup>

| Study number | Study authors, year (References) | Participants                                                             | Intervention and Control                                                                                                                                                                                     | Primary Outcomes <sup>2</sup>                                                                                                                                                                                                                                                              | Secondary Outcomes <sup>3</sup>                                                                                                                                                                                                                                                                                                        | Conclusions                                                                                                           | Comments                                                                 |
|--------------|----------------------------------|--------------------------------------------------------------------------|--------------------------------------------------------------------------------------------------------------------------------------------------------------------------------------------------------------|--------------------------------------------------------------------------------------------------------------------------------------------------------------------------------------------------------------------------------------------------------------------------------------------|----------------------------------------------------------------------------------------------------------------------------------------------------------------------------------------------------------------------------------------------------------------------------------------------------------------------------------------|-----------------------------------------------------------------------------------------------------------------------|--------------------------------------------------------------------------|
| 1            | Hagelberg et al 1990 (26)        | preterm infants $\leq 32$ weeks or birth weight $\leq 1500$ g ( $n=20$ ) | mother's milk supplemented with human milk protein (HMP) ( $n=10$ ) vs adapted cow's milk protein (CMP) ( $n=10$ ) and introduced when the infant is on 150ml/Kg/day of milk feeds and continued for 3 weeks | weight gain (g/kg/day): $11.2 \pm 5.1$ vs $13.1 \pm 4.58^{*y}$<br>Gain in length (cm/week): $0.57 \pm 0.26$ vs $0.71 \pm 0.42^{*y}$<br>Gain in head circumference (cm/week): $0.78 \pm 0.18$ vs $0.67 \pm 0.26^{*y}$                                                                       | calcium (mmol/l) at 3 weeks: $2.3(0.5-5)$ vs $2(1-4)^{^y}$<br>Phosphorus (mmol/l) at 3 weeks: $8.3(3-13.2)$ vs $2.7(0.6-7.4)^{^y}$<br>Urea at 3 weeks (mmol/l): $3.2(1.9-7.4)$ vs $5.3(1.4-12.8)^{^y}$<br>Sepsis: 6/10 vs 3/10 <sup>y</sup><br>NEC: 0/10 vs 0/10 <sup>y</sup><br>Mortality during the study: 0/10 vs 1/10 <sup>y</sup> | No significant alterations in the amino acid profiles of peripheral blood by the type of fortifier                    | The overall advantages of human milk protein needs to be studied further |
| 2            | Boehm et al 1993(27)             | very low birth weight infants with birth weight $< 1500$ g ( $n=24$ )    | human milk supplemented with human milk protein ( $n=11$ ) vs bovine milk protein ( $n=13$ ) for 14 days when the infant reached total feed volume of 150ml/Kg/day and continued for 14 days                 | alpha amino nitrogen (mmol/L): $1.63 \pm 0.23$ vs $1.70 \pm 0.19^{*y}$<br>Urea (mmol/L): $2.06 \pm 0.32$ vs $1.94 \pm 0.28^{*y}$<br>Prealbumin (mg/l): $94.2 \pm 16.8$ vs $101.8 \pm 18.6^{*y}$<br>Weight gain (g/day): $32.1$ vs $31.3^y$<br>Gain in length (cm/week): $1.19$ vs $1.13^y$ | (EPO vs. placebo): NEC: 0/7 vs. 0/8 <sup>y</sup> ;<br>BPD: 5/7 vs. 8/8 <sup>y</sup> ; ROP: 1/7 vs. 2/8 <sup>y</sup> ;<br>PDA: 4/7 vs. 3/8 <sup>y</sup> ; IVH: 0/7 vs 1/8 <sup>y</sup> ;<br>mortality: 0/7 vs. 1/9                                                                                                                      | Human milk enriched with a well balanced fortifier, even when based on non human sources can fulfil nutritional needs | Small sample size, short duration of treatment                           |

|   |                           |                                                        |                                                                                                                                                                                                                                         |                                                                                                                                                                                                                                                                                                       |                                                                                                                                                                                                                                                            |                                                                                                                                  |                                                                               |
|---|---------------------------|--------------------------------------------------------|-----------------------------------------------------------------------------------------------------------------------------------------------------------------------------------------------------------------------------------------|-------------------------------------------------------------------------------------------------------------------------------------------------------------------------------------------------------------------------------------------------------------------------------------------------------|------------------------------------------------------------------------------------------------------------------------------------------------------------------------------------------------------------------------------------------------------------|----------------------------------------------------------------------------------------------------------------------------------|-------------------------------------------------------------------------------|
| 3 | Polberger et al 1999 (25) | preterm infants with birth weight 920g-1750g (n=32)    | human milk fortified when the fed volume was 150ml/Kg/day with a bovine whey protein fortifier (n=16) vs ultrafiltered human milk protein fortifier (n=16) for 24 days.                                                                 | gain in weight (g/Kg/day): 15.6±2.9 vs 14.7±3.2* <sup>¥</sup><br>Gain in length 9cm/wk, mean±SD: 0.97±0.34 vs 1.02±0.23* <sup>¥</sup><br>Gain in head circumference (cm/wk), mean±SD: 1.06±0.21 vs 1.02±0.23* <sup>¥</sup>                                                                            | urea (mmol/l): 1.3±0.7 vs 1.8±0.7* <sup>¥</sup><br>Albumin (g/l): 31±4 vs 33±4* <sup>¥</sup><br>Amino acid content F vs HMP: serine: 161±40 vs 192±95* <sup>#</sup><br>Proline: 220±53 vs 340±95* <sup>#</sup><br>Ornithins: 93±24 vs 141±53* <sup>#</sup> | Routine analysis of human milk protein and energy content to optimise the use of human milk for feeding in preterm infants       | Small sample size, short duration of treatment                                |
| 4 | Cristofalo et al (29)     | preterm infants with birth weight 500g-1250g (n=53)    | mother's milk supplemented with human milk protein (HMP) (n=29) vs adapted cow's milk protein (CMP) (n=24) and introduced when the infant is on 100ml/Kg/day of milk feeds and continued for 91 days                                    | gain in weight (g/day): 15±5.8 vs 17±7.1* <sup>#</sup><br>Gain in length (cm/week): 0.84±0.21 vs 1.12±0.28* <sup>#</sup><br>Gain in head circumference (cm/week): 0.78±0.26 vs 0.88±0.18* <sup>¥</sup>                                                                                                | Mortality: 0/29 (0%) vs 2/24 (8%)<br>NEC: 1/29 (3%) vs 5/24 (21%) <sup>¥</sup><br>Surgical NEC: 0/29 (1%) vs 4/24 (17%) <sup>#</sup><br>Sepsis: 16/29 (55%) vs 19/24 (79%) <sup>¥</sup>                                                                    | Recommends the use of exclusive human milk based diet for extremely preterm infants.                                             | Small sample size                                                             |
| 5 | Sullivan 2010 et al (24)  | preterm infants with birth weight 500 to 1250g (n=136) | mother's milk supplemented with human milk fortifier (HMF 100) (n=67) vs bovine milk based HMF (n=69) when the enteral intake was 100ml/Kg/day and continued for 91 days of age/discharge from hospital/attainment of 50% oral feedings | gain in weight (g/Kg/day): HM100 vs BOV: 14.2 (11.9, 15.8) vs 15.1 (12.8, 17) <sup>@ ¥</sup><br>Gain in length (cm/wk): HM100 vs BOV: 0.86 (0.72, 1.08) vs 0.94 (0.72, 1.16) <sup>@ ¥</sup><br>Gain in head circumference (cm/wk) HM100 vs BOV: 0.76 (0.62, 0.85) vs 0.75 (0.62, 0.86) <sup>@ ¥</sup> | NEC: 3/67 vs 11/69 <sup>#</sup><br>NEC requiring surgery: 1/67 vs 7/69 <sup>#</sup><br>Mortality: 1/67 vs 5/69 <sup>#</sup>                                                                                                                                | The use of exclusive human milk based diet in extremely preterm infants is associated with reduced rates of NEC and surgical NEC | Advocates the use of newer technology to use exclusive human milk based diet. |

|   |                      |                                             |                                                                                                                                                                                                                                                                                                                                      |                                                                                                                                                                                                                                                                                                                  |                                                                                                                                                                                                                                                                                                                                                                                                                                                                                                                                                                                                                                                                                       |                                                                                                                                                                      |                                                                                                              |
|---|----------------------|---------------------------------------------|--------------------------------------------------------------------------------------------------------------------------------------------------------------------------------------------------------------------------------------------------------------------------------------------------------------------------------------|------------------------------------------------------------------------------------------------------------------------------------------------------------------------------------------------------------------------------------------------------------------------------------------------------------------|---------------------------------------------------------------------------------------------------------------------------------------------------------------------------------------------------------------------------------------------------------------------------------------------------------------------------------------------------------------------------------------------------------------------------------------------------------------------------------------------------------------------------------------------------------------------------------------------------------------------------------------------------------------------------------------|----------------------------------------------------------------------------------------------------------------------------------------------------------------------|--------------------------------------------------------------------------------------------------------------|
| 6 | O'Connor<br>2018(28) | preterm infants with<br>birth weight <1250g | human milk with added<br>fortifier; human milk based<br>fortifier (HMBF) (n=64) vs<br>bovine milk based fortifier<br>(BBF) (n=61) when<br>100ml/Kg/day feed was<br>reached and continued until<br>infants were 84 days of<br>age/discharge/when they<br>consumed ≥2 complete oral<br>feeds daily over 3 days which<br>ever was first | feeding interruption[n,(%)]:20/61 (32.8%)<br>17/64(26.6%) ,RD:-6.2 (-22.2,9.8) <sup>‡</sup><br>Weight(g) adjusted effect: 1124 (960,1065)<br>vs 1303(1150,1456) <sup>@‡</sup><br>length: 7.3 (6.3,8.3) vs 8.1 (7.1,9.2) <sup>@‡</sup><br>head circumference(cm): 6.2 (5.5,6.8) vs<br>6.8 (6.1,7.4) <sup>@‡</sup> | mortality and morbidity index: 31/64<br>(48.4%) vs 30/61 (49.2%), RD: -0.7 (-<br>18.3,16.8) <sup>‡</sup><br>Death: 3/64 (4.7%) vs 4/61 (6.6%), RD=-<br>1.9 (-10.0,6.2) <sup>‡</sup><br>Late onset sepsis: 8/64 (12.5%) vs 14/61<br>(23%), RD=-10.5 (-23.8, 2.9) <sup>‡</sup><br>NEC all stages : 3/64 (4.7%) vs 6/61<br>(9.8%), RD=-5.2 (-14.2,3.9) <sup>‡</sup><br>NEC ≥stage 2: 3/64 (4.7%) vs 3/61<br>(4.9%),RD=-0.2 (-7.7,7.3) <sup>‡</sup><br>Severe ROP: 1/62 (1.6%) vs<br>6/59(10.2%),RD=-8.6 (-16.9,-0.02) <sup>#</sup><br>Severe brain injury: 111/64(17.2%) vs<br>8/61 (13.1%), RD=4.1(-8.5,16.6)<br>BPD: 16/64(25%) vs 18/61 (29.5%),RD =-<br>4.5(-20.1,11.1) <sup>‡</sup> | The use of human milk<br>based fortifier did not<br>improve feeding tolerance<br>or reduce mortality and<br>morbidity compared to<br>bovine milk based<br>fortifier. | Routine use of<br>human milk<br>based fortifier<br>over bovine<br>milk based<br>fortifier not<br>recommended |
|---|----------------------|---------------------------------------------|--------------------------------------------------------------------------------------------------------------------------------------------------------------------------------------------------------------------------------------------------------------------------------------------------------------------------------------|------------------------------------------------------------------------------------------------------------------------------------------------------------------------------------------------------------------------------------------------------------------------------------------------------------------|---------------------------------------------------------------------------------------------------------------------------------------------------------------------------------------------------------------------------------------------------------------------------------------------------------------------------------------------------------------------------------------------------------------------------------------------------------------------------------------------------------------------------------------------------------------------------------------------------------------------------------------------------------------------------------------|----------------------------------------------------------------------------------------------------------------------------------------------------------------------|--------------------------------------------------------------------------------------------------------------|

<sup>1</sup> Bov: bovine; BPD: bronchopulmonary dysplasia; CLD: Chronic lung disease; CI: Confidence interval; ELBW: Extremely low birth weight; HM: human milk; LOS: Late onset sepsis; NEC: Necrotizing enterocolitis; PDA: patent ductus arteriosus; RD: risk difference; rhEPO: recombinant erythropoietin; ROP: Retinopathy of prematurity;

<sup>2,3</sup> for these columns; \* mean±SD; ^mean (range); @ median (25<sup>th</sup> centile, 75<sup>th</sup> centile) # P<0.01; ‡P=NS (not significant)

### Supplemental Table 2<sup>^</sup>: Sensitivity analysis

^

| Item                                  | No: of studies                                      | Sample size | RR (95% CI REM)          | I <sup>2</sup> statistic (%) |
|---------------------------------------|-----------------------------------------------------|-------------|--------------------------|------------------------------|
| Definite NEC                          |                                                     |             |                          |                              |
| low ROB on random sequence generation | 2( O' Connor 2018, Sullivan 2010)                   | 261         | 0.47 (0.14,1.54)         | 31                           |
| low ROB on allocation concealment     | 1(O' Connor 2018)                                   | 125         | 0.95 (0.20,4.54)         | NA                           |
| low ROB on blinding                   | 2 ( O' Connor 2018, Cristofalo 2013)                | 178         | 0.46 (0.08,2.52)         | 44                           |
| HMF supplementation till discharge    | 3 ( O' Connor 2018, Cristofalo 2013, Sullivan 2010) | 314         | <b>0.38 (0.15,0.95)</b>  | 9                            |
| Minimal or no industry bias           | 2 ( O' Connor 2018, Hagelberg 1990)                 | 145         | 0.95 (0.20,4.54)         | NA                           |
| Surgical NEC                          |                                                     |             |                          |                              |
| low ROB on random sequence generation | 1 ( Sullivan 2010)                                  | 136         | 0.15 (0.02, 1.16)        | NA                           |
| low ROB on allocation concealment     | 0                                                   | 0           | NA                       | NA                           |
| low ROB on blinding                   | 1 ( Cristofalo 2013)                                | 53          | 0.09 (0.01, 1.64)        | NA                           |
| HMF supplementation till discharge    | 2 ( Cristofalo 2013, Sullivan 2010)                 | 189         | <b>0.13 (0.02, 0.67)</b> | 0                            |
| Minimal or no industry bias           | 1 (Hagelberg 1990)                                  | 20          | Not estimable            | NA                           |
| mortality                             |                                                     |             |                          |                              |
| low ROB on random sequence generation | 2 (O'Connor 2018, Sullivan 2010)                    | 261         | 0.48 (0.14,1.59)         | 0                            |
| low ROB on allocation concealment     | 1 (O'Connor 2018)                                   | 125         | 0.71(0.17, 3.06)         | NA                           |
| low ROB on blinding                   | 2 ( O'Connor 2018, Cristofalo 2013)                 | 178         | 0.54 (0.15,2.00)         | 0                            |
| HMF supplementation till discharge    | 3 ( O' Connor 2018, Cristofalo 2013, Sullivan 2010) | 314         | 0.41 (0.14, 1.26)        | 0                            |
| Minimal or no industry bias           | 2 ( O'Connor 2018, Hagelberg 1990)                  | 145         | 0.62 (0.17, 2.32)        | 0                            |

^ Definite NEC and surgical NEC are significantly decreased in HMF group vs BMF group when HMF is supplemented till discharge

## Supplemental Figure 1: sensitivity analysis (Definite NEC)

### 1a) Low ROB on random sequence generation

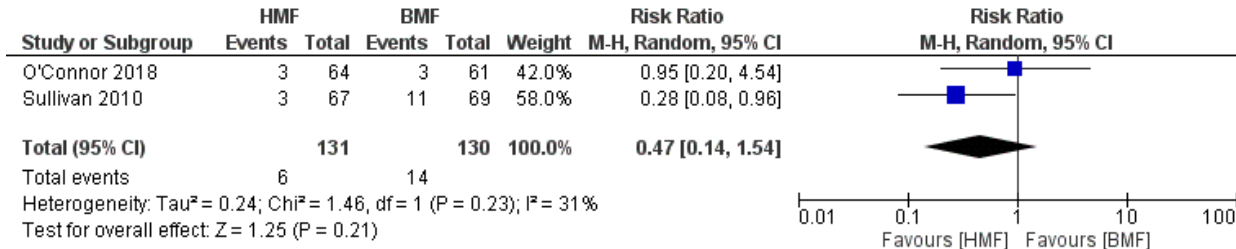

### 1b) Low ROB on allocation concealment

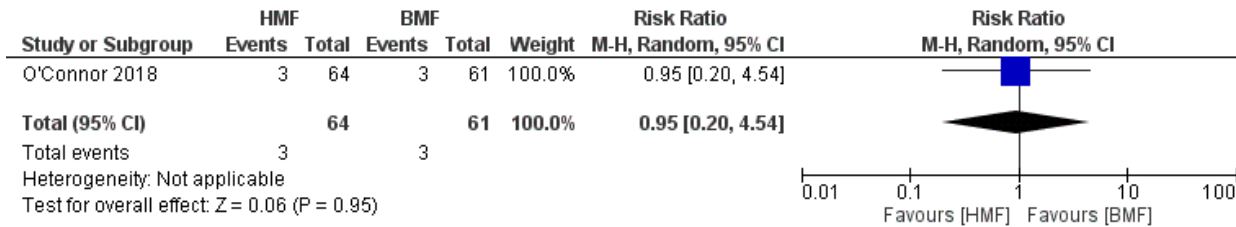

### 1c) Low ROB on blinding

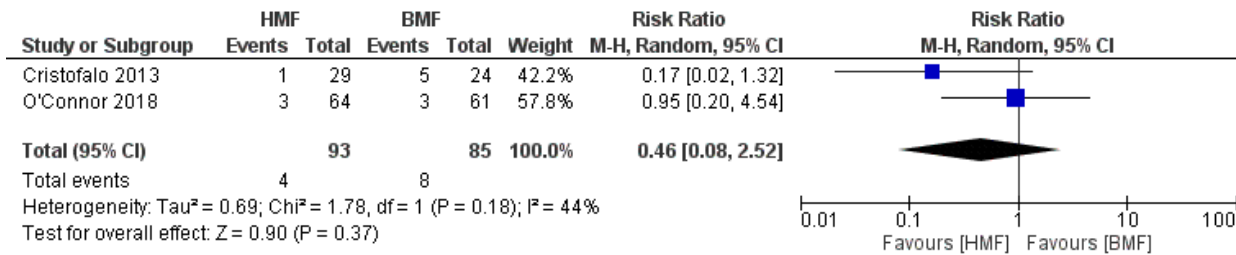

### 1d) HMF supplementation till discharge

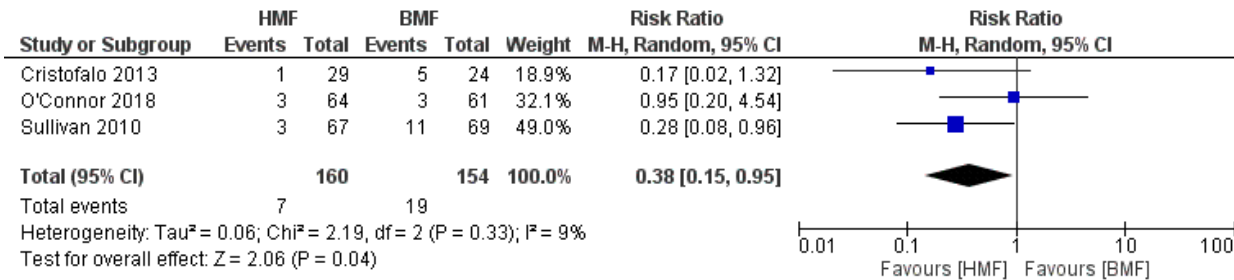

### 1e) Minimal or no industry bias

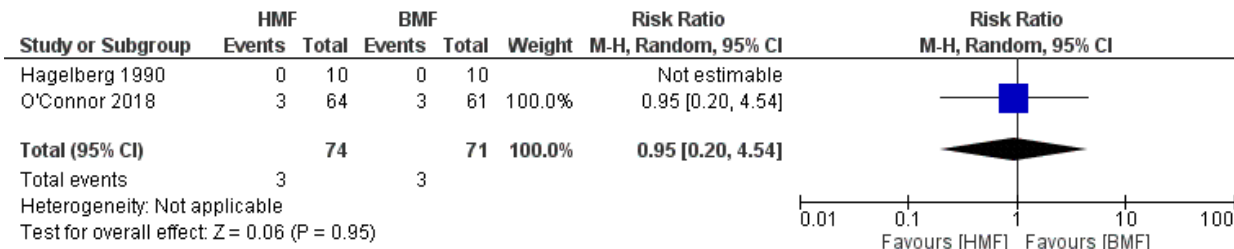

## Supplemental Figure 2: sensitivity analysis (Surgical NEC)

### 2a) Low ROB on random sequence generation

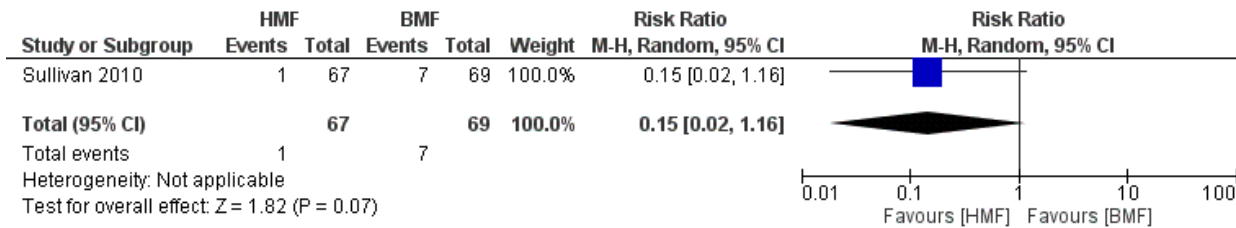

### 2b) Low ROB on blinding

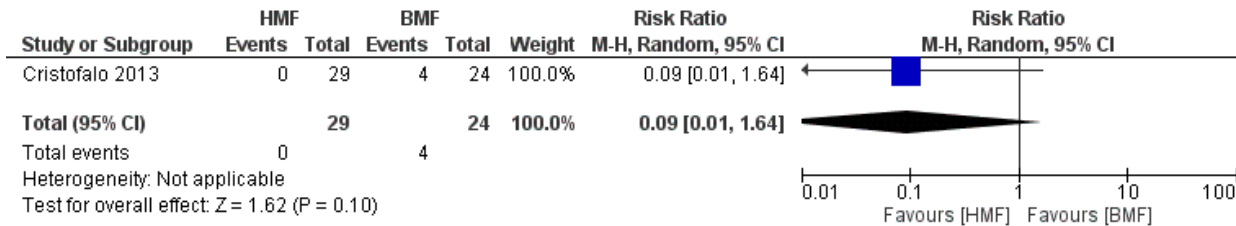

### 2c) HMF supplementation till discharge

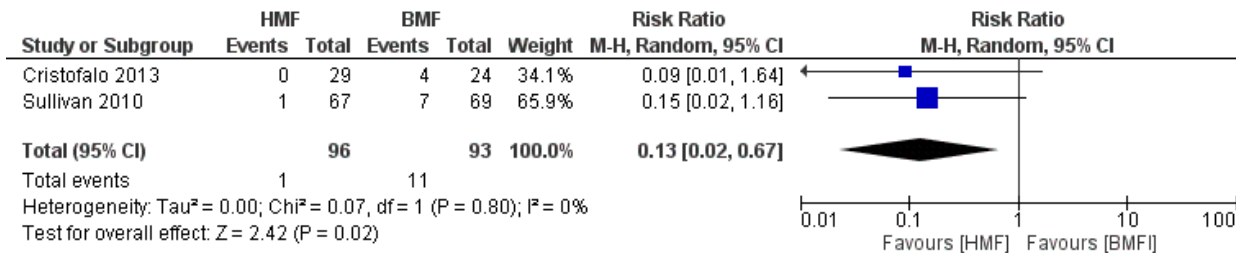

### Supplemental Figure 3: sensitivity analysis (mortality)

#### 3a) Low ROB on random sequence generation

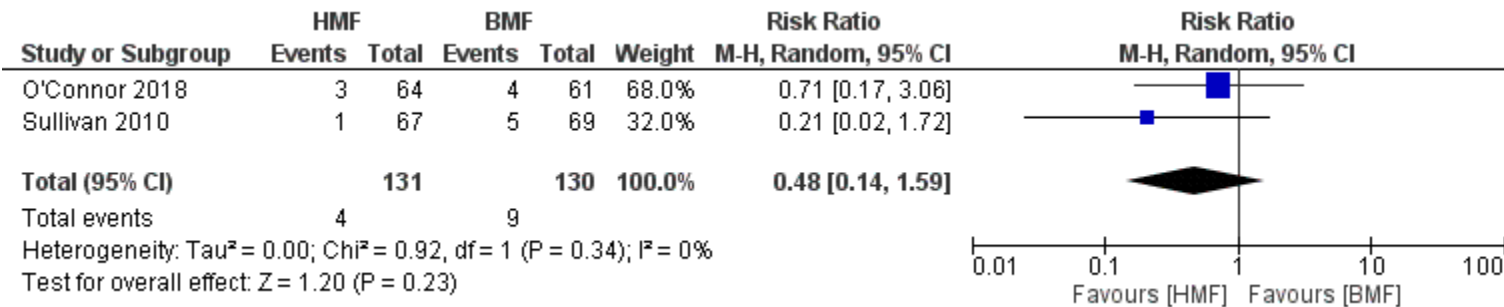

#### 3b) Low ROB on allocation concealment

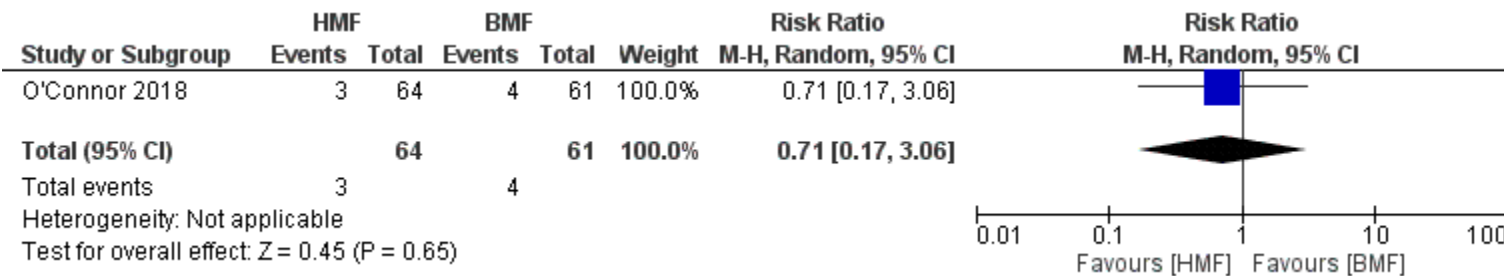

#### 3c) Low ROB on blinding

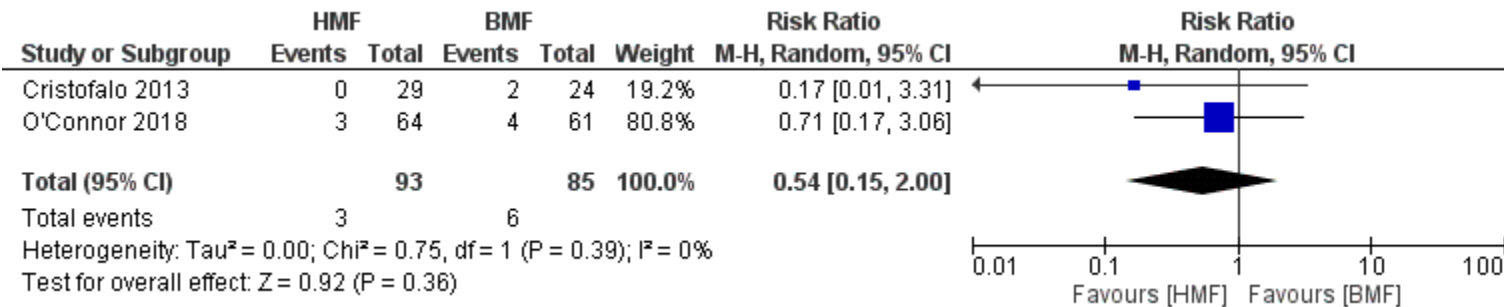



### 3d) HMF supplementation till discharge

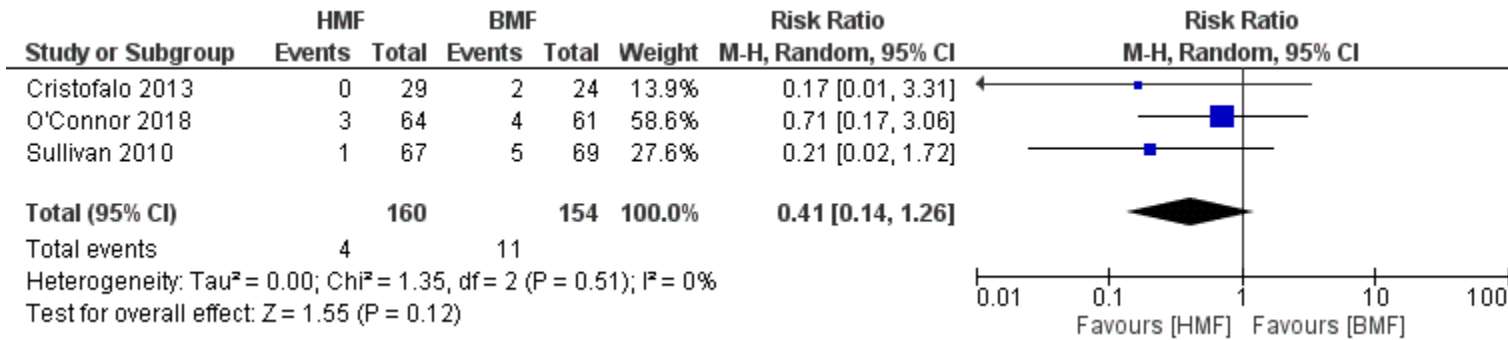

### 3e) Minimal or no industry bias

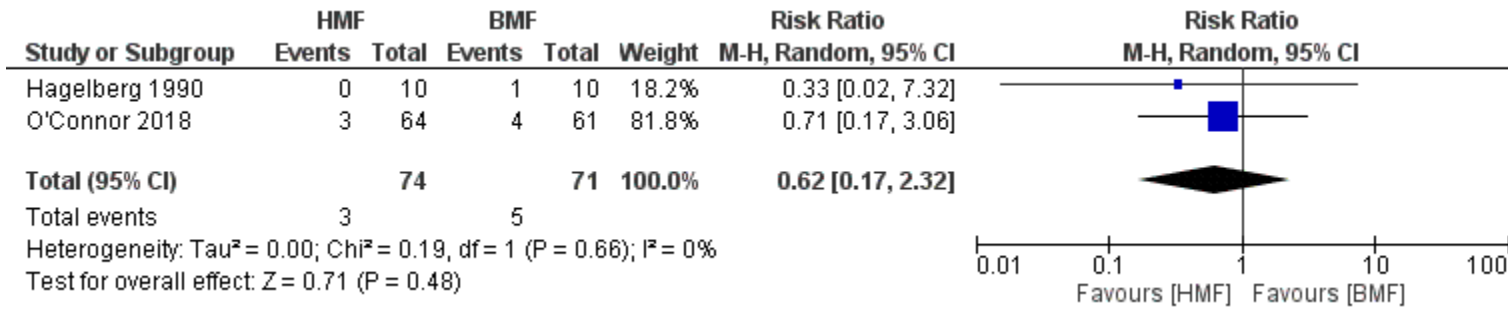

Supplement: nmaa039_supplemental_file.pdf [file nmaa039_supplemental_file.pdf]
